# Supplementary material for: Plasmonic nanobiosensors for detection of microRNA cancer biomarkers in clinical samples
Source: Royal Society of Chemistry journal article supplement (doi:10.1039/d0an00193g), 2020-01-01
Supplement: d0an00193g1.pdf [file d0an00193g1.pdf]

## Supporting Information

### Plasmonic Nanobiosensors for Detection of MicroRNA Cancer Biomarkers in Clinical Samples

Bridget M. Crawford<sup>a,b</sup>; Hsin-Neng Wang<sup>a,b</sup>; Christina Stolarchuk<sup>c</sup>; Richard J. von Furstenberg<sup>c</sup>; Pietro Strobbia<sup>a,b</sup>; Dadong Zhang<sup>d</sup>; Xiaodi Qin<sup>d</sup>; Kouros Owzar<sup>e</sup>; Katherine S. Garman<sup>c\*</sup>; Tuan Vo-Dinh<sup>a,b,f\*</sup>

<sup>a</sup> Fitzpatrick Institute for Photonics, Duke University, Durham, NC, USA.

<sup>b</sup> Department of Biomedical Engineering, Duke University, Durham, NC, USA.

<sup>c</sup> Division of Gastroenterology, Department of Medicine, Duke University, Durham, NC, USA.

<sup>d</sup> Duke Cancer Institute, Duke University, Durham, NC, USA.

<sup>e</sup> Biostatistics and Bioinformatics, Duke University, Durham, NC, USA.

<sup>f</sup> Department of Chemistry, Duke University, Durham, NC, USA.

Email: katherine.garman@duke.edu; tuan.vodinh@duke.edu

#### Table of Contents

|                   |                                                                                                                                                                                                                                                                                                                                                               |
|-------------------|---------------------------------------------------------------------------------------------------------------------------------------------------------------------------------------------------------------------------------------------------------------------------------------------------------------------------------------------------------------|
| <b>Table S1.</b>  | Clinical sample labeling and histopathological discrimination. Histopathological diagnoses included normal tissue, EAC, esophageal squamous cell carcinoma (ESCC) and BE. Those samples denoted with an asterisk were unable to be tested by iMS assay due to insufficient amount of extracted RNA for triplicate measurement (100 ng required per iMS test). |
| <b>Figure S1.</b> | Transmission electron microscopy (TEM) images of gold nanostars and silver-coated gold nanostars.                                                                                                                                                                                                                                                             |
| <b>Figure S2.</b> | Absorbance of silver-coated gold nanostars before and after modification with DNA sequences to achieve iMS nanoprobe.                                                                                                                                                                                                                                         |
| <b>Figure S3.</b> | Detection sensitivity of the iMS nanobiosensors for miR-21 detection. Spectra offset for clarity.                                                                                                                                                                                                                                                             |
| <b>Table S2.</b>  | True positive (sensitivity) and true negative (specificity) of discriminating esophageal cancer (EC) from normal tissue.                                                                                                                                                                                                                                      |
| <b>Table S3.</b>  | True positive (sensitivity) and true negative (specificity) of discriminating EC & Barrett's esophagus (BE) from normal tissue.                                                                                                                                                                                                                               |
| <b>Figure S4.</b> | Receiver Operating Characteristics (ROC) curve for iMS response of patient samples diagnosed as normal vs. unhealthy (Barrett's esophagus and esophageal cancer). The area under the curve (AUC) indicates how well the iMS technique can distinguish between the two diagnostic groups.                                                                      |
| <b>Figure S5.</b> | Detection of miR-21 within paired tissue biopsies. SERS intensities (area-under-curve of the 557cm <sup>-1</sup> peak; arbitrary units) are given for patient pairs diagnosed as (A) normal and tumor, (B) normal and Barrett's esophagus (BE), and (C) BE and tumor.                                                                                         |
| <b>Table S4.</b>  | Concordance (Kendall Tau) and correlation (Pearson correlation) between miR-21 PCR results (normalized by cel-39) and SERS intensity (area-under-curve of the 557cm <sup>-1</sup> peak)                                                                                                                                                                       |

**Table S1.** Clinical sample labeling and histopathological discrimination. Histopathological diagnoses included normal tissue, EAC, esophageal squamous cell carcinoma (ESCC) and BE. Those samples denoted with an asterisk were unable to be tested by iMS assay due to insufficient amount of extracted RNA for triplicate measurement (100 ng required per iMS test).

| De-identified Sample ID | Patient Number | Sample Type |
|-------------------------|----------------|-------------|
| Sample 1                | 5              | EAC         |
| Sample 2                | 10             | BE          |
| Sample 3*               | 6              | Normal      |
| Sample 4                | 5              | Normal      |
| Sample 5                | 4              | BE          |
| Sample 6                | 1              | Normal      |
| Sample 7                | 10             | EAC         |
| Sample 8                | 9              | Normal      |
| Sample 9                | 7              | EAC         |
| Sample 10               | 2              | BE          |
| Sample 11               | 8              | EAC         |
| Sample 12*              | 9              | ESCC        |
| Sample 13               | 3              | BE          |
| Sample 14               | 6              | BE          |
| Sample 15               | 1              | EAC         |
| Sample 16               | 4              | Normal      |
| Sample 17               | 8              | Normal      |
| Sample 18               | 3              | Normal      |
| Sample 19               | 7              | Normal      |
| Sample 20*              | 2              | Normal      |

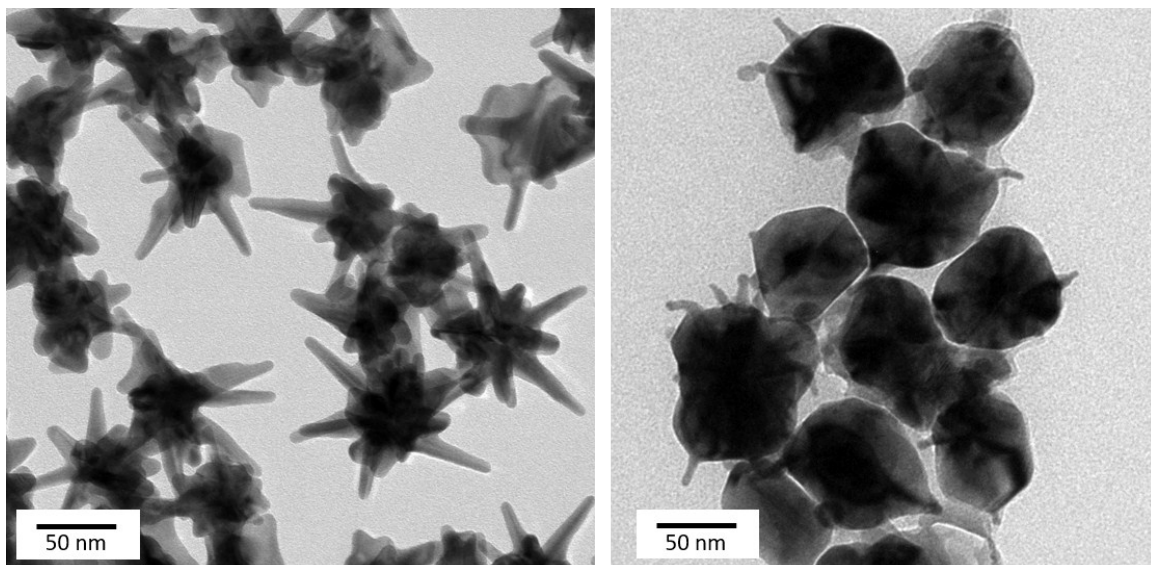

**Figure S1.** TEM images of gold nanostars (left) and silver coated gold nanostars (right).

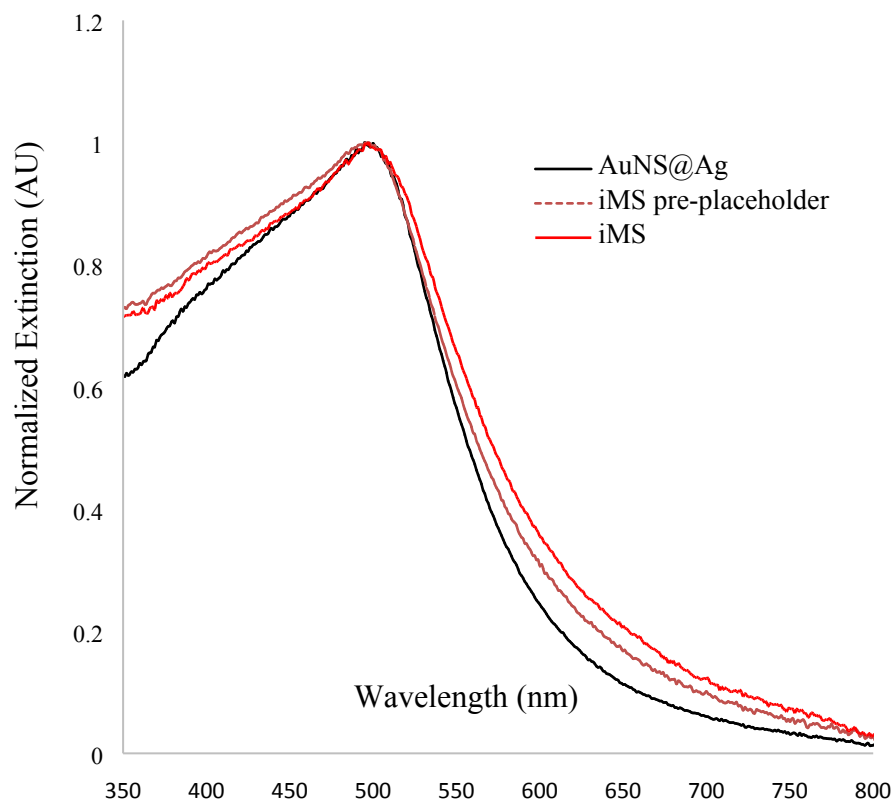

**Figure S2.** Absorbance of silver-coated gold nanostars (AuNS@Ag) before modification with DNA sequences, after modification with stem-loop probe (iMS pre-placeholder) and following addition of placeholder to achieve fully prepared nanoprobe (iMS). The absence of a shift in absorbance peak demonstrates that no particle aggregation occurred during iMS synthesis.

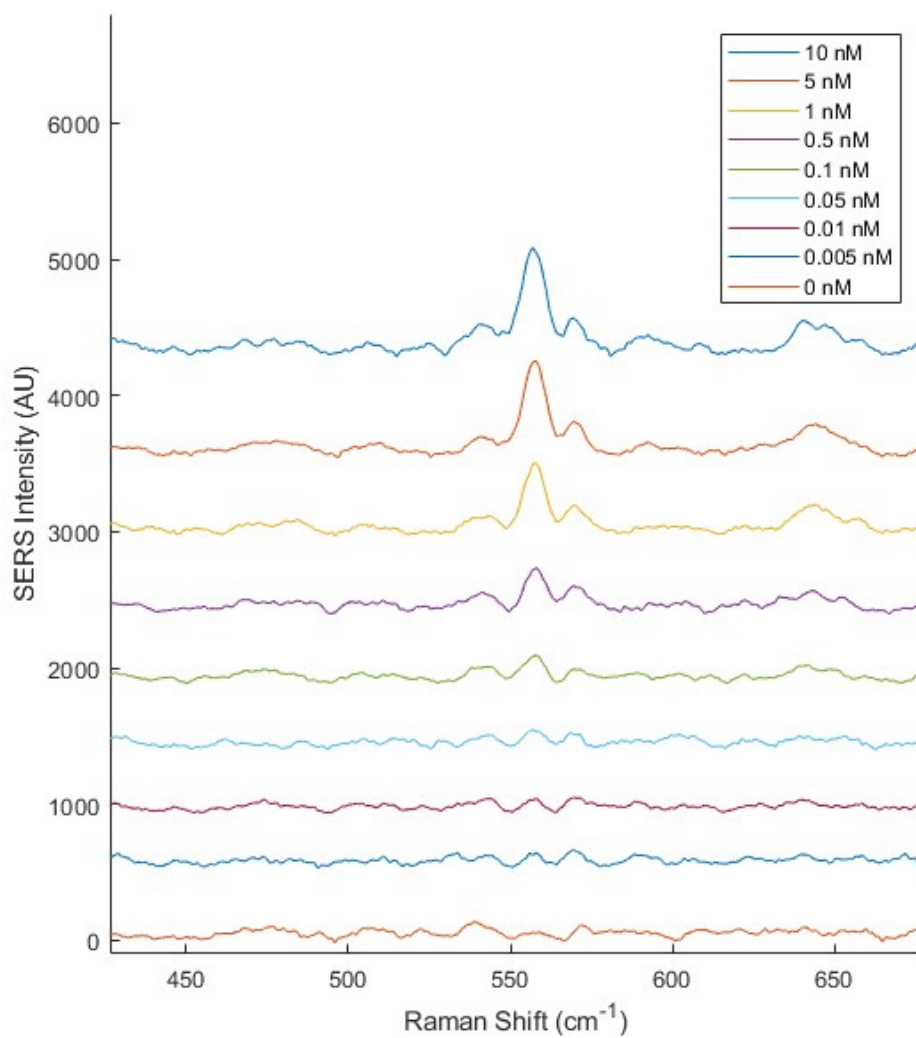

**Figure S3.** Detection sensitivity of the iMS nanobiosensors for miR-21 detection. Spectra offset for clarity.

**Table S2.** True positive (sensitivity) and true negative (specificity) of discriminating esophageal cancer (EC) from normal tissue.

|               | EC                                 | Normal                             | Total |
|---------------|------------------------------------|------------------------------------|-------|
| Total         | 5                                  | 7                                  | 12    |
| Test Positive | 5                                  | 0                                  | 5     |
| Test Negative | 0                                  | 7                                  | 7     |
|               | <b>True Positive</b><br>5/5 = 100% | <b>True Negative</b><br>7/7 = 100% |       |

**Table S3.** True positive (sensitivity) and true negative (specificity) of discriminating EC & Barrett's esophagus (BE) from normal tissue

|               | EC & BE                            | Normal                             | Total |
|---------------|------------------------------------|------------------------------------|-------|
| Total         | 10                                 | 7                                  | 17    |
| Test Positive | 9                                  | 0                                  | 9     |
| Test Negative | 1                                  | 7                                  | 8     |
|               | <b>True Positive</b><br>9/10 = 90% | <b>True Negative</b><br>7/7 = 100% |       |

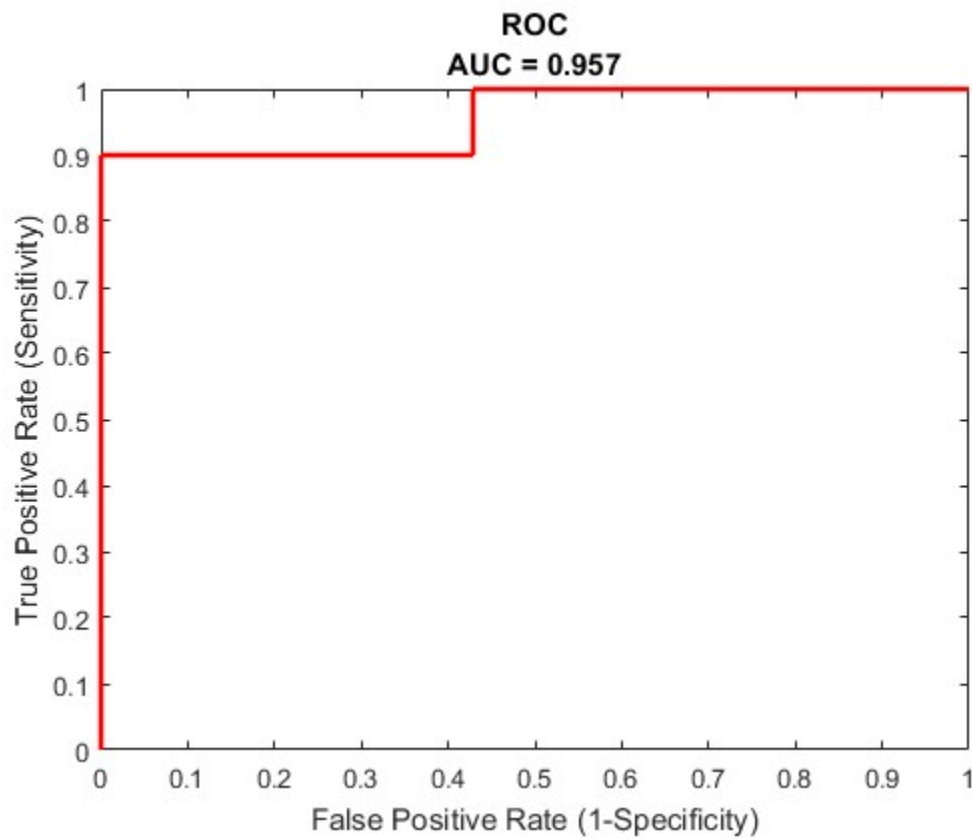

**Figure S4.** Receiver Operating Characteristics (ROC) curve for iMS response of patient samples diagnosed as normal vs. unhealthy (Barrett's esophagus and esophageal cancer). The area under the curve (AUC) indicates how well the iMS technique can distinguish between the two diagnostic groups.

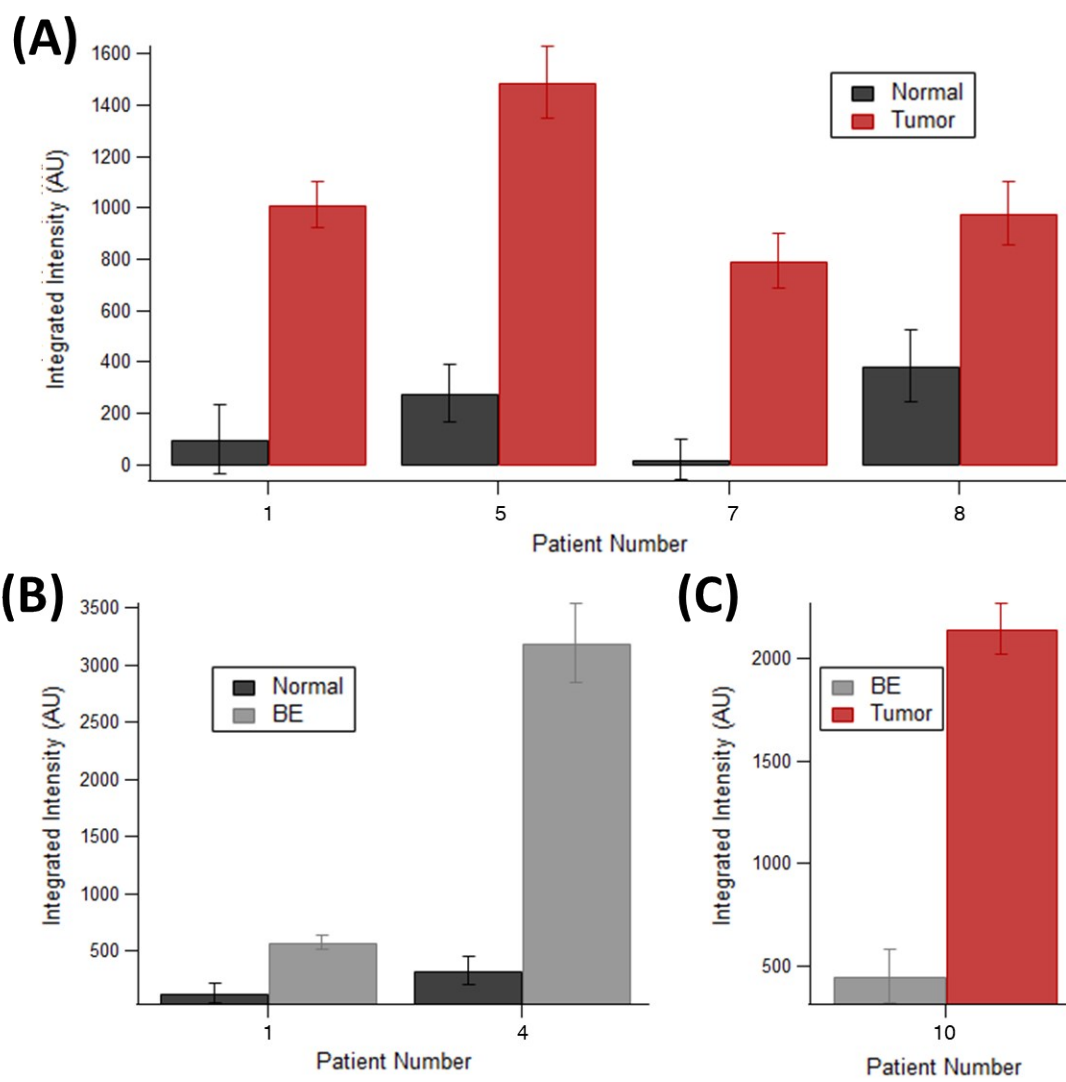

**Figure S5.** Detection of miR-21 within paired tissue biopsies. SERS intensities (area-under-curve of the 557cm<sup>-1</sup> peak; arbitrary units) are given for patient pairs diagnosed as (A) normal and tumor, (B) normal and Barrett's esophagus (BE), and (C) BE and tumor.

**Table S4.** Concordance (Kendall Tau) and correlation (Pearson correlation) between miR-21 PCR results (normalized by cel-39) and SERS intensity (area-under-curve of the 557cm<sup>-1</sup> peak) within each tissue type as determined by histopathological diagnosis.

|                     | <b>n</b> | <b>τ</b> | <b>p-value</b> | <b>ρ</b> | <b>p-value</b> |
|---------------------|----------|----------|----------------|----------|----------------|
| All types combined  | 17       | 0.8      | <0.001         | 0.63     | 0.007          |
| Normal              | 7        | 1.0      | <0.001         | 0.93     | 0.003          |
| Barrett's Esophagus | 5        | 0.6      | 0.23           | 0.40     | 0.51           |
| Tumor               | 5        | 0.6      | 0.23           | 0.70     | 0.19           |

## References

1. H. Yuan, C. G. Khoury, H. Hwang, C. M. Wilson, G. A. Grant and T. Vo-Dinh, *Nanotechnology*, 2012, **23**, 075102.
2. A. M. Fales, H. Yuan and T. Vo-Dinh, *The Journal of Physical Chemistry C*, 2014, **118**, 3708-3715.
3. H.-N. Wang, B. M. Crawford, A. M. Fales, M. L. Bowie, V. L. Seewaldt and T. Vo-Dinh, *The Journal of Physical Chemistry C*, 2016, **120**, 21047-21055.
4. R. C. Team, 2013.
5. A. I. McLeod, *R Package Kendall*, 2005.
6. W. Venables, B. Ripley and S. Isbn, 2002.
7. Y. Xie, *Dynamic Documents with R and knitr*, Chapman and Hall/CRC, 2016.
